# Supplementary material for: Amelioration of Experimental autoimmune encephalomyelitis and DSS induced colitis by NTG-A-009 through the inhibition of Th1 and Th17 cells differentiation
Source: PubMed Central journal article supplement (PMC5958108; doi:10.1038/s41598-018-26088-y), 2018-05-17
Supplement: 41598_2018_26088_MOESM1_ESM.pdf [file 41598_2018_26088_MOESM1_ESM.pdf]

**Title:**

Amelioration of Experimental autoimmune encephalomyelitis and DSS induced colitis by NTG-A-009 through the inhibition of Th1 and Th17 cells differentiation.

**Authors:**

Suman Acharya<sup>1</sup>, Maheshwor Timilshina<sup>1</sup>, Liyuan Jiang<sup>1</sup>, Sabita Neupane<sup>1</sup>, Dong-Young Choi<sup>1</sup>, Sang Won Park<sup>2</sup>, Sang Yeul Lee<sup>2</sup>, Byeong-Seon Jeong<sup>1</sup>, Jung-Ae Kim<sup>1</sup>, Tae-gyu Nam<sup>2\*</sup>, Jae-Hoon Chang<sup>1\*</sup>

<sup>1</sup>College of Pharmacy, Yeungnam University, Gyeongsan 38541, Republic of Korea

<sup>2</sup>Department of Pharmacy and Institute of Pharmaceutical Science and Technology, Hanyang University, Ansan 15588, Republic of Korea

\*Correspondence to: Jae-Hoon Chang and Tae-gyu Nam

Jae-Hoon Chang: Email: jchang@yu.ac.kr; Tel: +82-53-810-2833; Fax: +82-53-810-4654

Tae-gyu Nam: Email: tnam@hanyang.ac.kr, Tel: +82-31-400-5807; Fax: +82-31-400-5958

**a**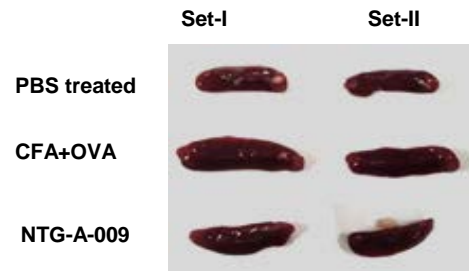**b**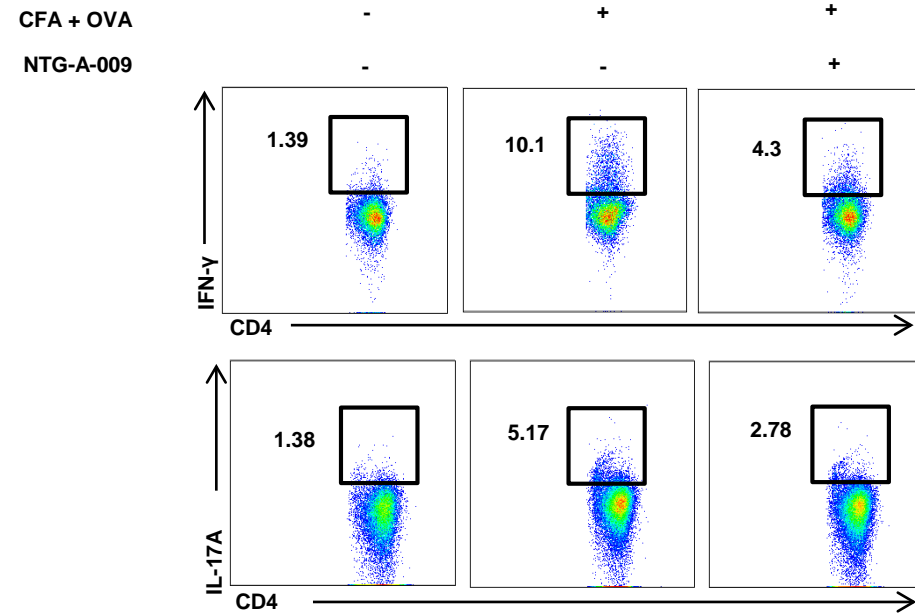**c**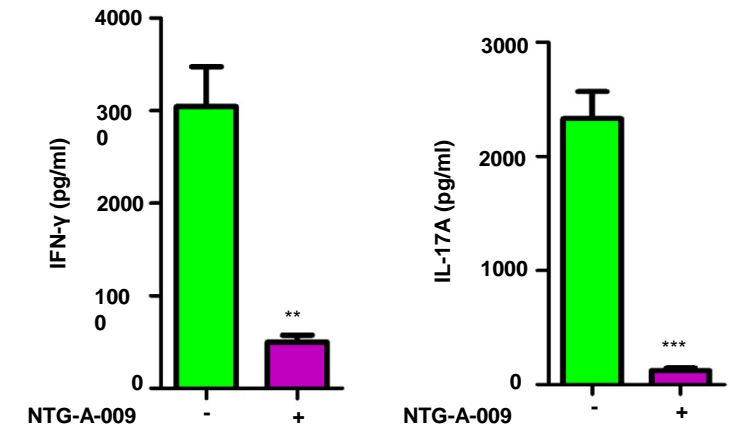

**Supplementary information 1- Inflammation suppression by NTG-A-009 in CFA and OVA injected mice.** (a) 8-12 weeks C57BL/6 mice were intraperitoneally immunized with 200ul of CFA and OVA mixture for the induction of acute inflammation. PBS or NTG-A-009 (2 mg/kg/day) was administered intraperitoneally in every other day. Images of spleens from PBS, CFA/OVA and NTG-A-009 treated mice at day 7 were compared. (b) Spleens and lymph nodes were restimulated for 4 hour with phorbol 12-myristate 13-acetate and ionomycin and the percentage of Th1 and Th17 was analyzed by FACS through intracellular staining of IFN- $\gamma$  and IL-17A. (c)- The quantification of IFN- $\gamma$  and IL-17A was assessed by cytokine binding assay as described in materials and methods. Data represent three independent experiments with similar results. Mean  $\pm$  SEM of the triplicates are shown \*\*P < 0.01; \*\*\*P < 0.001.

**a**

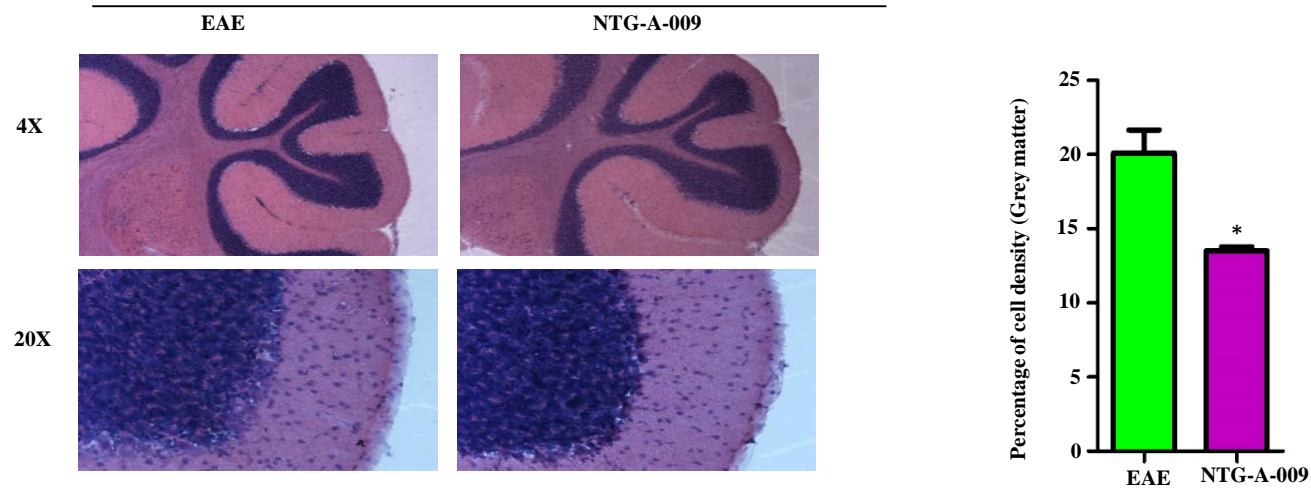

**Supplementary information 2- NTG-A-009 reduces the infiltration of inflammatory cells in brain.** (a) Section of the brain obtained from the EAE control and NTG-A-009 treated mice was analyzed for inflammation by H & E staining. Bar diagram denotes the total cell density. Data are the representative of three independent experiments. Mean  $\pm$  SEM of the triplicates are shown \* $p < 0.05$

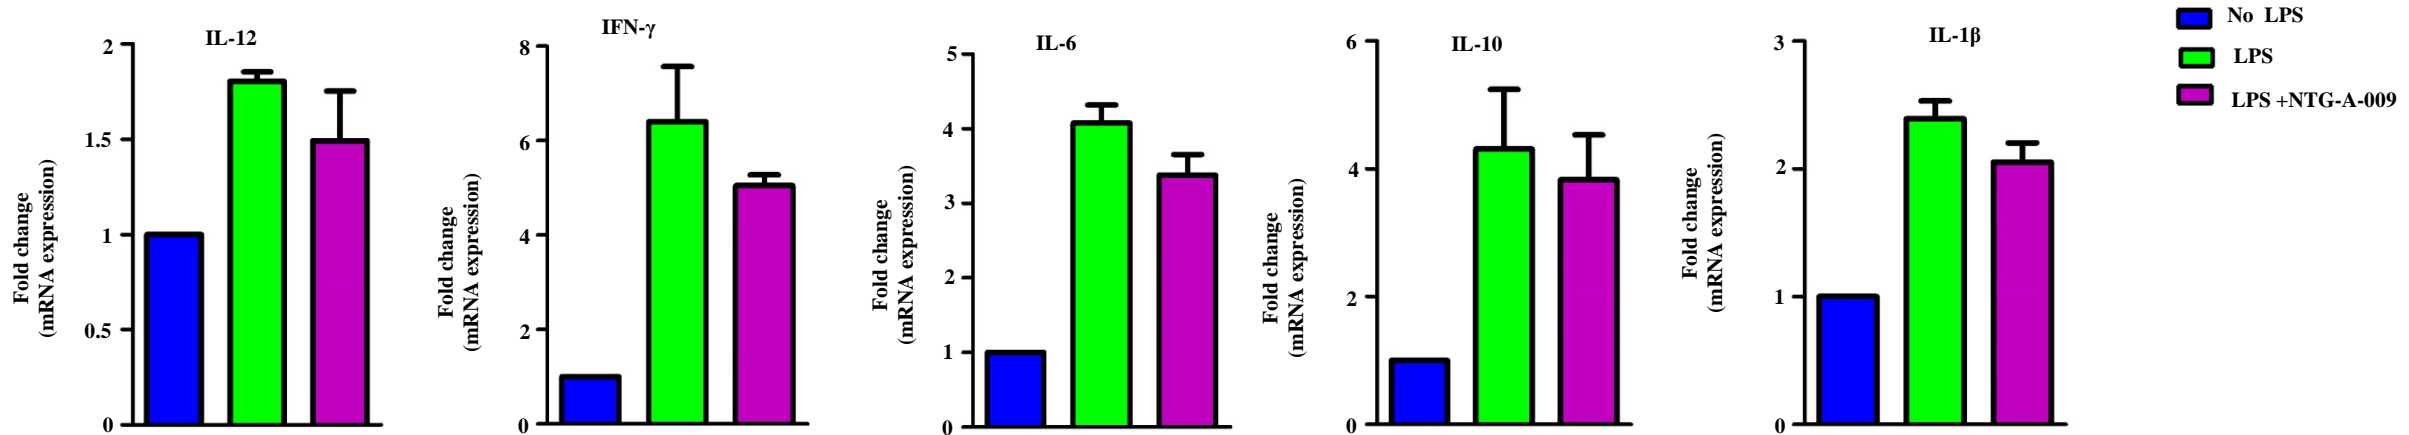

**Supplementary information 3- NTG-A-009 has no inhibitory effect on bone marrow derived dendritic cells.** Bone marrow was isolated from tibias and femur of 6-8 weeks female C57BL/6 mice and co-cultured with 20 ng/ml recombinant granulocyte macrophage colony stimulation factor (GM-CSF). At day 8 non-adherent cells were collected and cultured with NTG-A-009 along with 200 ng/ml lipopolysaccharides (LPS) for 4 hours. RNA was prepared followed by cDNA preparation A- mRNA expression of related cytokines was shown. Data are the representative of three independent experiments. Mean  $\pm$  SEM of the triplicates are shown

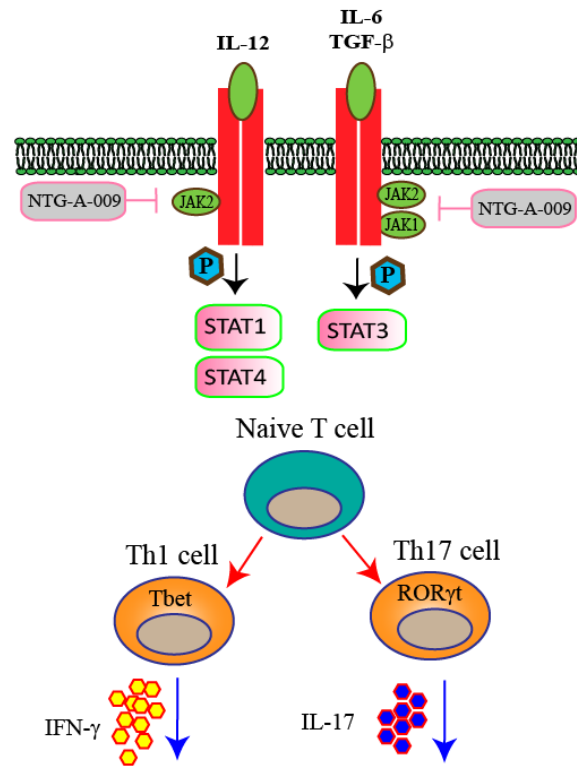

- Experimental Autoimmune Encephalomyelitis
- DSS induced colitis

**Supplementary information 4- Proposed molecular mechanisms of NTG-A-009.** IL-12 activates STAT4 for Th1 differentiation through the activation of its upstream protein JAK2 while IL-6 and TGF-  $\beta$  induces STAT3 for the differentiation and function of Th17 through the activation of JAK1/JAK2.

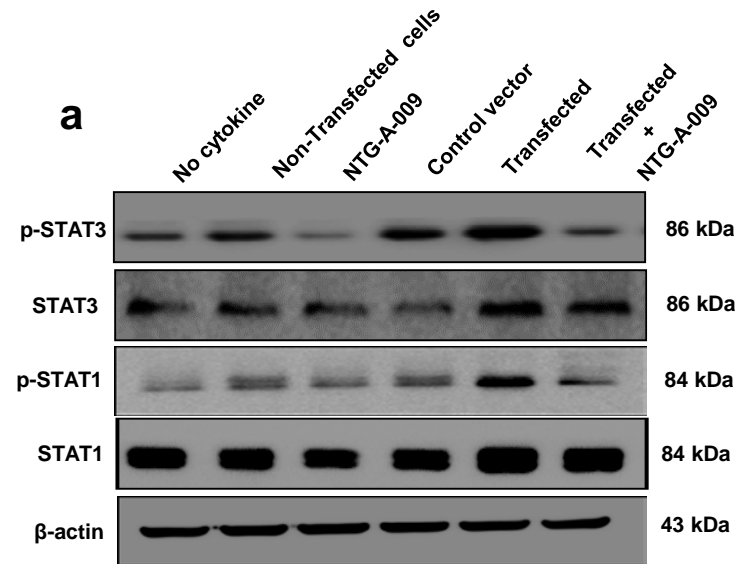

**Supplementary information 5- Effects of NTG-A-009 on overexpressed STAT1 and STAT3 proteins.** (a) CD4<sup>+</sup> T cells were transfected with an STAT1 and STAT3 expressing plasmid. After 48 hour of transfection, the cells were treated with NTG-A-009 for 24 hour. The expression of phosphorylated and total form of STAT1 and STAT3 was analyzed by western blotting. Data are the representative of three independent experiments.

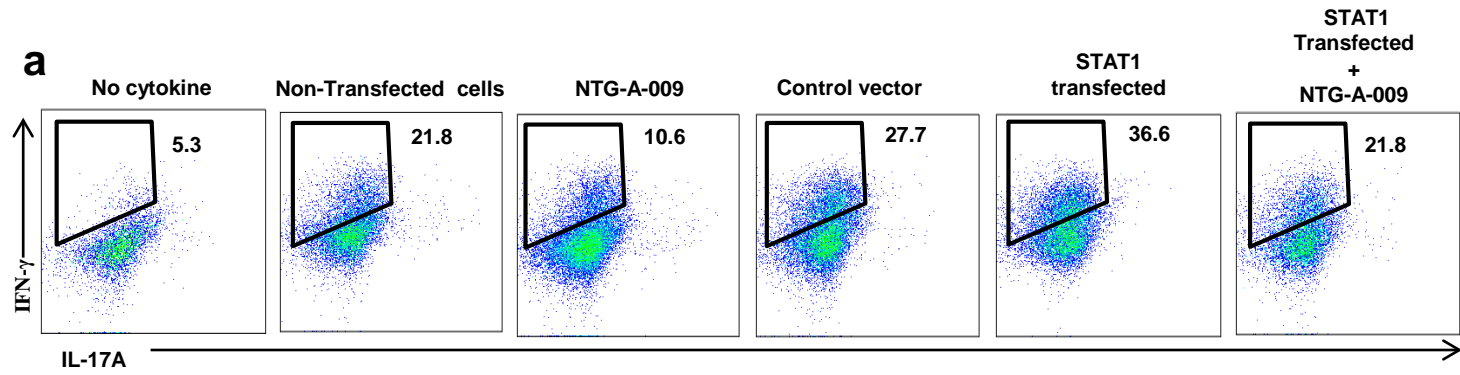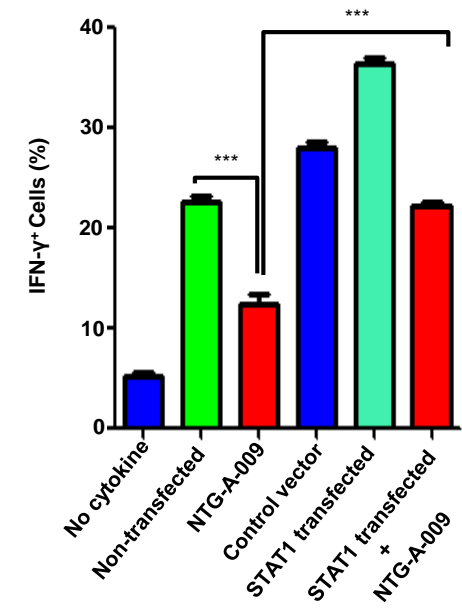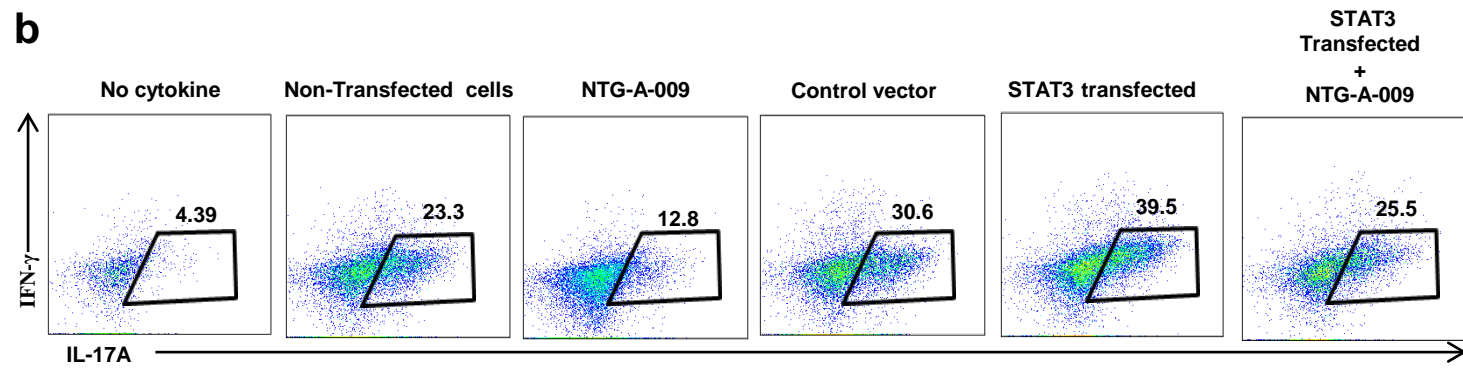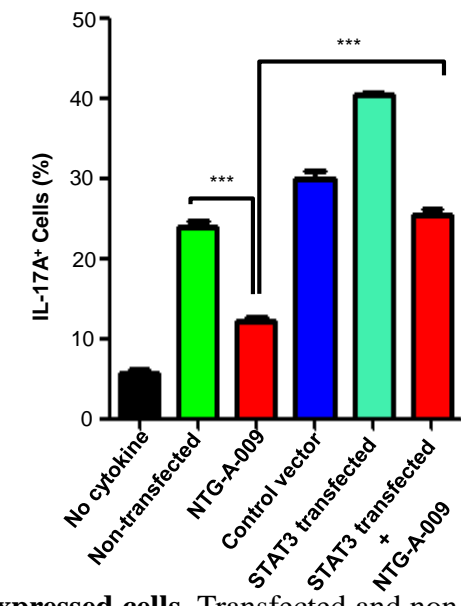

**Supplementary information 6- Effect of NTG-A-009 on Th1 and Th17 differentiation from STAT1 and STAT3 overexpressed cells.** Transfected and non-transfected CD4 T cells were stimulated with anti-CD3 (1 $\mu$ g/ml) and anti-CD28 (1 $\mu$ g/ml) in the presence or absence of NTG-A-009 under Th1 and Th17 differentiation condition. **(a,b)** The percentage of IFN- $\gamma$ <sup>+</sup> Th1 **(a)** and IL-17A<sup>+</sup> Th17 cells **(b)** was determined by flow cytometry. Data are the representative of three independent experiment. Mean  $\pm$  SEM of the triplicates are shown \*\*\* $P < 0.001$ .

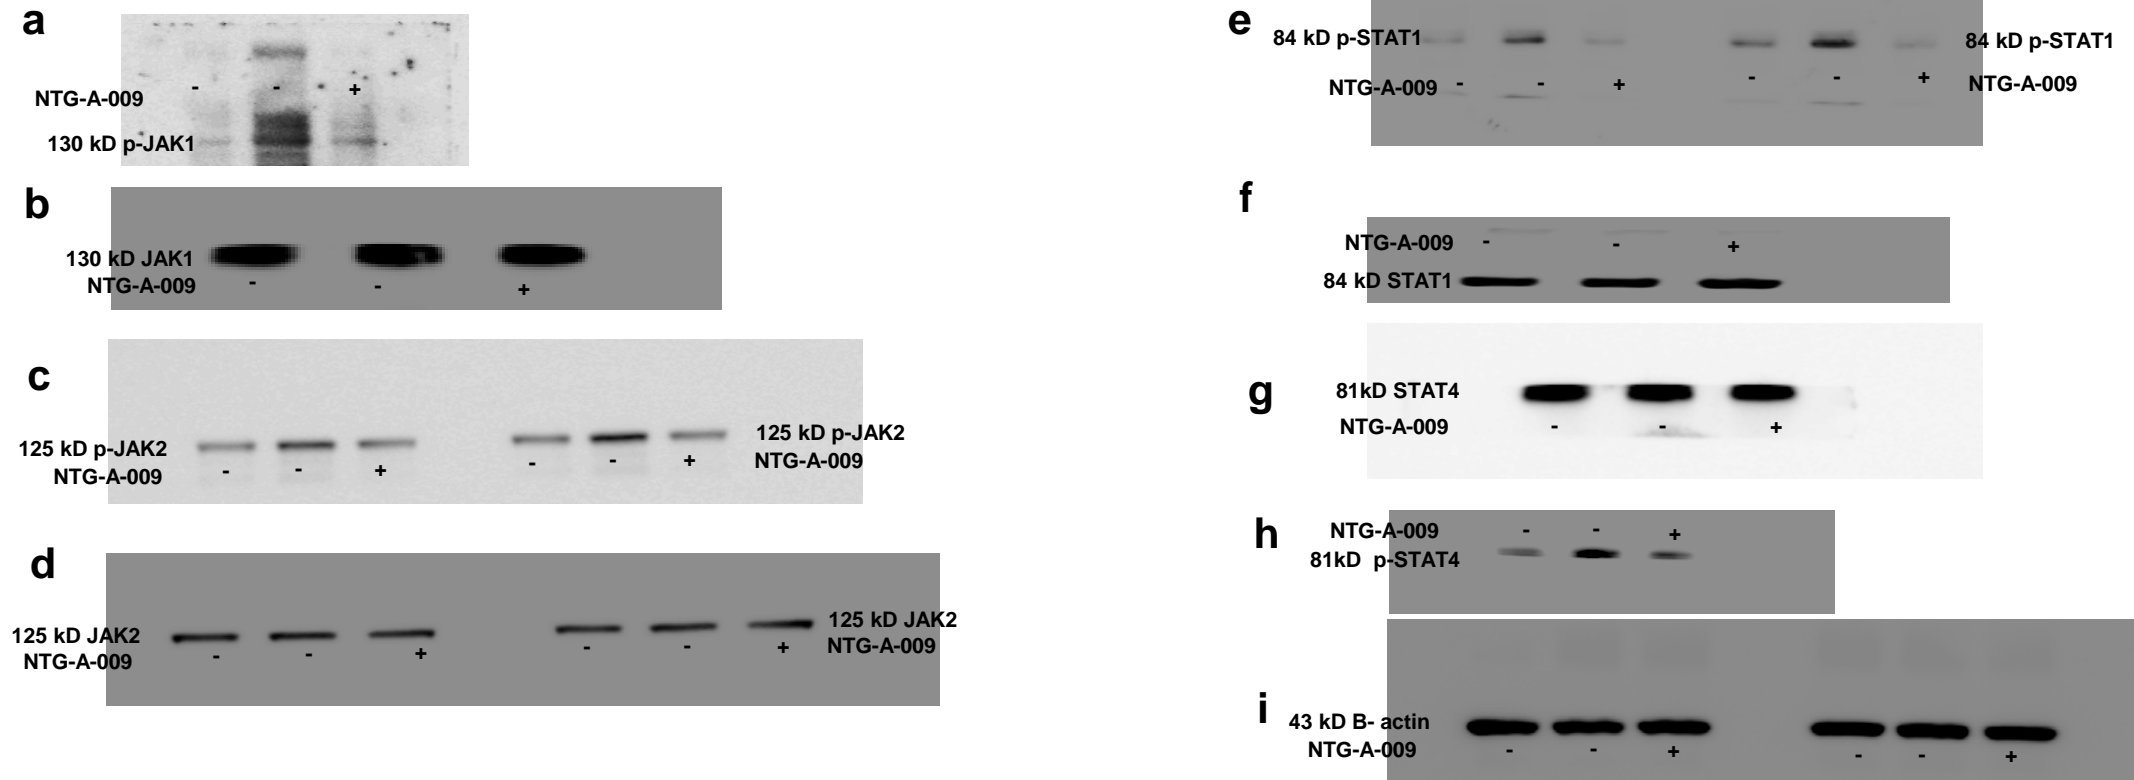

**Supplementary information 7- uncropped scans of the western blot.** Main figure 3(a) naïve CD4<sup>+</sup> T cells cultured under Th1 condition in the presence or absence of NTG-A-009 and further stimulated with anti-CD3 and anti-CD28 and immunoblot was carried out. representative images of (a, b) phosphorylated and total form of JAK1 proteins, (c- h) phosphorylated and total form of JAK2, STAT1, STAT4 proteins respectively. (i) representative image of  $\beta$ -actin was shown.



**j**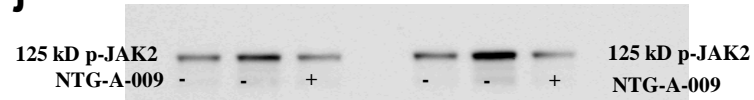**k**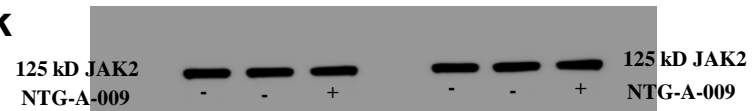**l**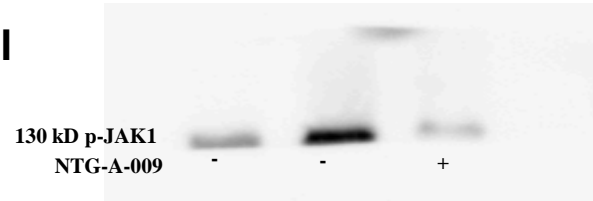**m**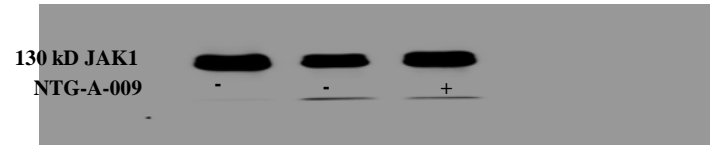**n**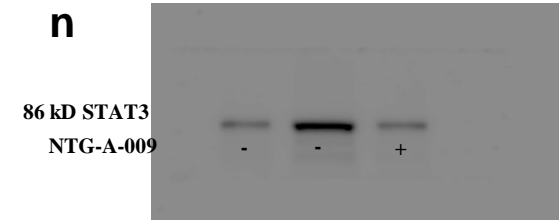**o**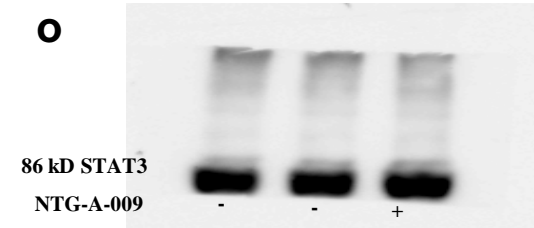**p**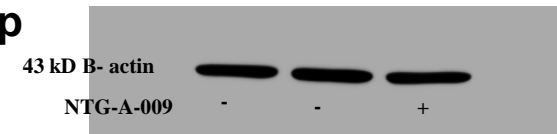

**Supplementary information 8- uncropped scans of the western blot.** Main figure 3(b) naïve CD4<sup>+</sup> T cells cultured under Th17 condition in the presence or absence of NTG-A-009 and further stimulated with anti-CD3 and anti-CD28 and immunoblot was carried out. representative images of (j,k) phosphorylated and total form of JAK2 proteins, (l-o) phosphorylated and total form of JAK1 and STAT3 proteins respectively. (i) representative image of  $\beta$ -actin was detected by immunoblotting under Th17 condition.

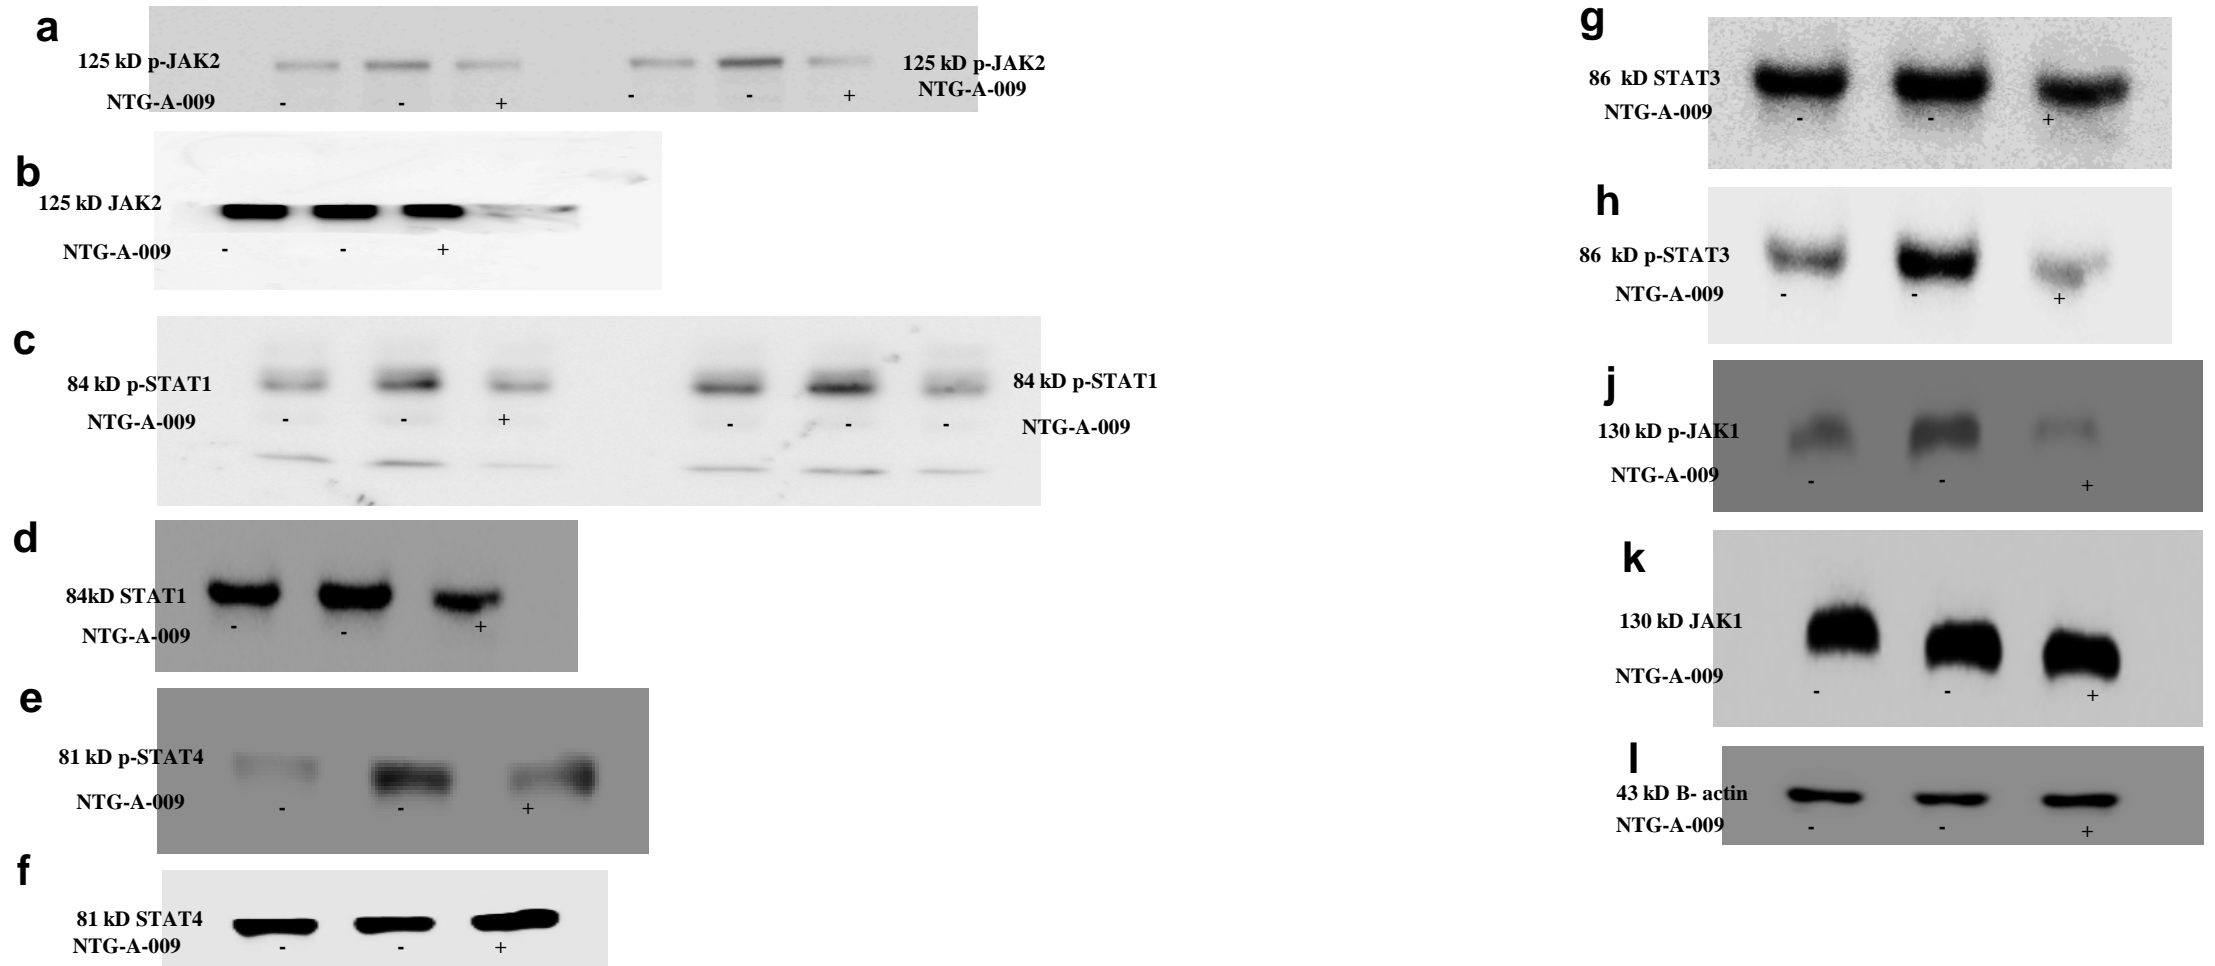

**Supplementary information 9- uncropped scans of the western blot. Main figure 5** Splenocytes derived from the EAE and NTG-A-009 treated mice were further overnight restimulated with MOG<sub>35-55</sub> peptide and CD4<sup>+</sup> T cells were analyzed. Immunoblotting was done for the expression of phosphorylated form of JAK/STAT proteins in JAK/STAT signaling pathway. (a-k) Representative images of phosphorylated and total form of JAK2, STAT1, STAT4, STAT3, JAK1 were shown respectively. (l) image of  $\beta$ -actin that was used as loading control.

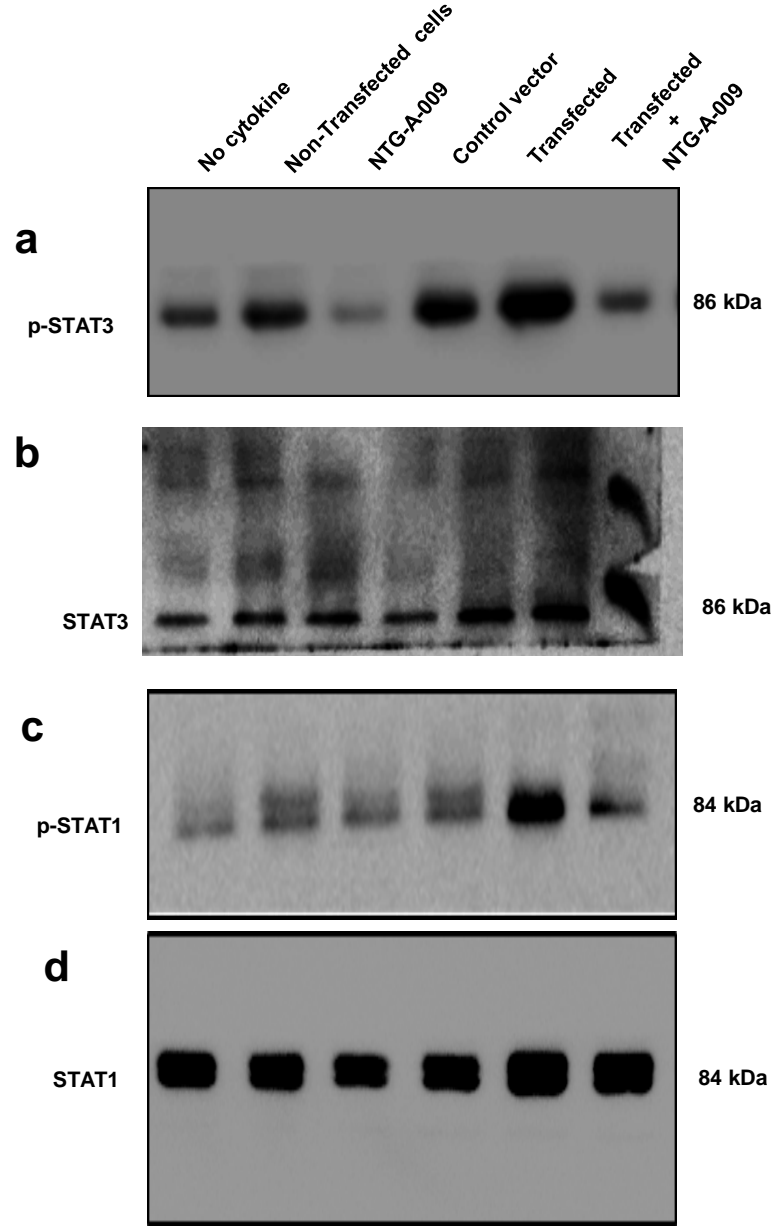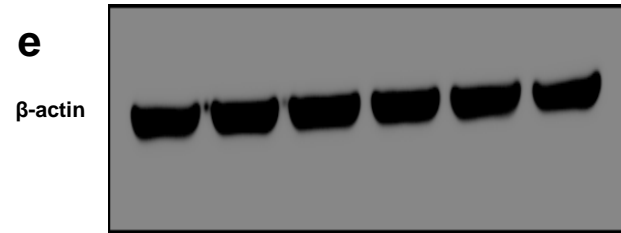

**Supplementary information 10- uncropped scans of supplementary figure 5a** . CD4<sup>+</sup> T cells were transfected with an STAT1 and STAT3 expressing plasmid. After 48 hour of transfection, the cells were treated with NTG-A-009 for 24 hour. (a-e) The expression of phosphorylated and total form of STAT1 and STAT3 was analyzed by western blotting. Data are the representative of three independent experiments.
